# Supplementary material for: Preference of Conjugated Bile Acids over Unconjugated Bile Acids as Substrates for OATP1B1 and OATP1B3
Source: PubMed Central journal article supplement (PMC5218478; doi:10.1371/journal.pone.0169719), 2017-01-06
Supplement: pone.0169719.s002.pdf [file pone.0169719.s002.pdf]

**S1 Table. Analysis of selected reaction monitoring (SRM) parameters and internal standards for bile acids.**

| Analytes                                      | SRM transition              | Fragmentor     | Collision      | Internal standard                             |
|-----------------------------------------------|-----------------------------|----------------|----------------|-----------------------------------------------|
|                                               |                             | voltage<br>(V) | Energy<br>(eV) |                                               |
| CA                                            | $m/z$ 407 $\rightarrow$ 407 | 230            | 0              | 3, 7, 12- $^{18}\text{O}$ ]CA                 |
| GCA                                           | $m/z$ 464 $\rightarrow$ 74  | 210            | 45             | 3, 7- $^{18}\text{O}$ ]GCA                    |
| TCA                                           | $m/z$ 514 $\rightarrow$ 80  | 300            | 95             | 3, 7- $^{18}\text{O}$ ]GCA                    |
| CDCA                                          | $m/z$ 391 $\rightarrow$ 391 | 210            | 0              | 3, 7- $^{18}\text{O}$ , $^2\text{H}_2$ ]GCDCA |
| GCDCA                                         | $m/z$ 448 $\rightarrow$ 74  | 200            | 40             | 3, 7- $^{18}\text{O}$ , $^2\text{H}_2$ ]GCDCA |
| TDCA                                          | $m/z$ 498 $\rightarrow$ 80  | 290            | 90             | 3, 12- $^{18}\text{O}$ , $^2\text{H}_2$ ]TDCA |
| DCA                                           | $m/z$ 391 $\rightarrow$ 391 | 200            | 0              | 3- $^{18}\text{O}$ , $^2\text{H}_2$ ]GLCA     |
| GDCA                                          | $m/z$ 448 $\rightarrow$ 74  | 200            | 40             | 3, 7- $^{18}\text{O}$ , $^2\text{H}_2$ ]GCDCA |
| TDCA                                          | $m/z$ 498 $\rightarrow$ 80  | 290            | 75             | 3, 12- $^{18}\text{O}$ , $^2\text{H}_2$ ]TDCA |
| UDCA                                          | $m/z$ 391 $\rightarrow$ 391 | 230            | 0              | 3, 7, 12- $^{18}\text{O}$ ]CA                 |
| GUDCA                                         | $m/z$ 448 $\rightarrow$ 74  | 200            | 40             | 3, 7- $^{18}\text{O}$ ]GCA                    |
| TUDCA                                         | $m/z$ 498 $\rightarrow$ 80  | 290            | 75             | 3, 7- $^{18}\text{O}$ ]GCA                    |
| LCA                                           | $m/z$ 375 $\rightarrow$ 375 | 190            | 0              | 3- $^{18}\text{O}$ , $^2\text{H}_2$ ]GLCA     |
| GLCA                                          | $m/z$ 432 $\rightarrow$ 74  | 190            | 40             | 3- $^{18}\text{O}$ , $^2\text{H}_2$ ]GLCA     |
| TLCA                                          | $m/z$ 482 $\rightarrow$ 80  | 280            | 75             | 3- $^{18}\text{O}$ , $^2\text{H}_2$ ]TLCA     |
| 3, 7, 12- $^{18}\text{O}$ ]CA                 | $m/z$ 413 $\rightarrow$ 413 | 230            | 0              |                                               |
| 3, 7- $^{18}\text{O}$ ]GCA                    | $m/z$ 470 $\rightarrow$ 74  | 210            | 45             |                                               |
| 3, 7- $^{18}\text{O}$ , $^2\text{H}_2$ ]GCDCA | $m/z$ 454 $\rightarrow$ 74  | 200            | 40             |                                               |
| 3, 12- $^{18}\text{O}$ , $^2\text{H}_2$ ]TDCA | $m/z$ 504 $\rightarrow$ 80  | 290            | 75             |                                               |
| 3- $^{18}\text{O}$ , $^2\text{H}_2$ ]GLCA     | $m/z$ 435 $\rightarrow$ 74  | 190            | 40             |                                               |
| 3- $^{18}\text{O}$ , $^2\text{H}_2$ ]TLCA     | $m/z$ 485 $\rightarrow$ 80  | 280            | 75             |                                               |
