# Supplementary material for: Preference of Conjugated Bile Acids over Unconjugated Bile Acids as Substrates for OATP1B1 and OATP1B3
Source: PubMed Central journal article supplement (PMC5218478; doi:10.1371/journal.pone.0169719), 2017-01-06
Supplement: pone.0169719.s003.pdf [file pone.0169719.s003.pdf]

**S2 Table.  $K_m$  values of organic anion-transporting polypeptide (OATP) 1B1- and OATP1B3-mediated uptake of bile acids.**

| Bile acids | Expression system | OATP1B1          | OATP1B3          | Reference     |
|------------|-------------------|------------------|------------------|---------------|
|            |                   | $K_m$ ( $\mu$ M) | $K_m$ ( $\mu$ M) |               |
| CA         | HEK293            | 47.1 $\pm$ 0.6   | 42.2 $\pm$ 0.9   | Present study |
|            | HEK293            | 11.4             |                  | [21]          |
|            | Oocyte            |                  | 41.8             | [24]          |
| GCA        | HEK293            | 14.7 $\pm$ 2.7   | 15.3 $\pm$ 1.5   | Present study |
|            | Oocyte            | ND               | ND               | [34]          |
|            | Oocyte            |                  | 43.4             | [24]          |
| TCA        | Trophoblast       | ND               | ND               | [35]          |
|            | HEK293            | 10.6 $\pm$ 0.3   | 9.5 $\pm$ 0.9    | Present study |
|            | Oocyte            | 13.6             |                  | [22]          |
| TCA        | HEK293            | 33.8             |                  | [25]          |
|            | HEK293            | ND               | ND               | [33]          |
|            | HEK293            | 10.0             |                  | [21]          |
|            | Oocyte            | ND               | ND               | [34]          |
|            | Oocyte            |                  | 5.8 $\pm$ 1.2    | [23]          |
|            | MDCKII            |                  | 112              | [26]          |
|            | Oocyte            |                  | 42.2             | [24]          |
|            | HEK293            | 21.3             |                  | [32]          |
|            | HEK293            | 8.52             |                  | [31]          |
|            | CDCA              | HEK293           | +                | +             |
| GCDCA      | HEK293            | 9.6 $\pm$ 1.9    | 2.4 $\pm$ 0.1    | Present study |
|            | Trophoblast       | ND               | ND               | [35]          |
| TCDCA      | HEK293            | 2.9 $\pm$ 0.4    | 1.5 $\pm$ 0.2    | Present study |
|            | Oocyte            | ND               | ND               | [24]          |
| DCA        | HEK293            | +                | +                | Present study |
| GDCA       | HEK293            | 4.6 $\pm$ 0.3    | 5.6 $\pm$ 0.6    | Present study |
| TDCA       | HEK293            | 13.6 $\pm$ 2.5   | 2.4 $\pm$ 0.1    | Present study |
|            | Oocyte            | ND               | ND               | [24]          |
| UDCA       | HEK293            | NT               | NT               | Present study |
| GUDCA      | HEK293            | 2.6 $\pm$ 0.1    | 11.1 $\pm$ 0.7   | Present study |
|            | HEK293            | 5.17             | 24.7             | [27]          |
| TUDCA      | HEK293            | 5.2 $\pm$ 0.4    | 8.3 $\pm$ 0.6    | Present study |
|            | HEK293            | 7.47             | 15.9             | [27]          |
| LCA        | HEK293            | NT               | NT               | Present study |
| GLCA       | HEK293            | 0.74 $\pm$ 0.05  | 0.52 $\pm$ 0.04  | Present study |
| TLCA       | HEK293            | 0.84 $\pm$ 0.07  | 0.47 $\pm$ 0.09  | Present study |

ND: not determined, +: transported but  $K_m$  was not determined, NT: no significant transport was observed.

Each data represents the mean  $\pm$  S.E. (n = 3).
