# Supplementary material for: Preference of Conjugated Bile Acids over Unconjugated Bile Acids as Substrates for OATP1B1 and OATP1B3
Source: PubMed Central journal article supplement (PMC5218478; doi:10.1371/journal.pone.0169719), 2017-01-06
Supplement: pone.0169719.s004.pdf [file pone.0169719.s004.pdf]

**S3 Table. Experimentally determined apparent 1-octanol/water partition coefficient ( $P_{ow}$ ) of bile acids.**

| Bile acids | $P_{ow}$         | $\log P_{ow}$ | $\log D_{oct}$ |
|------------|------------------|---------------|----------------|
| CA         | $2.4 \pm 0.3$    | 0.38          | -2.0           |
| GCA        | $0.09 \pm 0.01$  | -1.02         | -4.4           |
| TCA        | $0.40 \pm 0.04$  | -0.40         | -6.8           |
| CDCA       | $264 \pm 27$     | 2.42          | 0.018          |
| GCDCA      | $3.6 \pm 0.2$    | 0.56          | -2.8           |
| TCDC       | $1.8 \pm 0.1$    | 0.25          | -6.2           |
| DCA        | $351 \pm 16$     | 2.55          | 0.15           |
| GDCA       | $6.1 \pm 0.3$    | 0.78          | -2.6           |
| TDCA       | $3.8 \pm 0.2$    | 0.58          | -5.8           |
| UDCA       | $73 \pm 3$       | 1.87          | -0.53          |
| GUDCA      | $0.59 \pm 0.03$  | -0.23         | -3.6           |
| TUDCA      | $0.62 \pm 0.07$  | -0.21         | -6.6           |
| LCA        | $28335 \pm 6546$ | 4.44          | 2.0            |
| GLCA       | $554 \pm 17$     | 2.74          | -0.66          |
| TLCA       | $469 \pm 17$     | 2.67          | -3.7           |

Each data represents the mean  $\pm$  S.D. (n = 6).
